# Supplementary material
Source: PubMed Central journal article supplement (PMC4058784)
Supplement: NIHMS473728-supplement-01.pdf [file NIHMS473728-supplement-01.pdf]

Figure S1

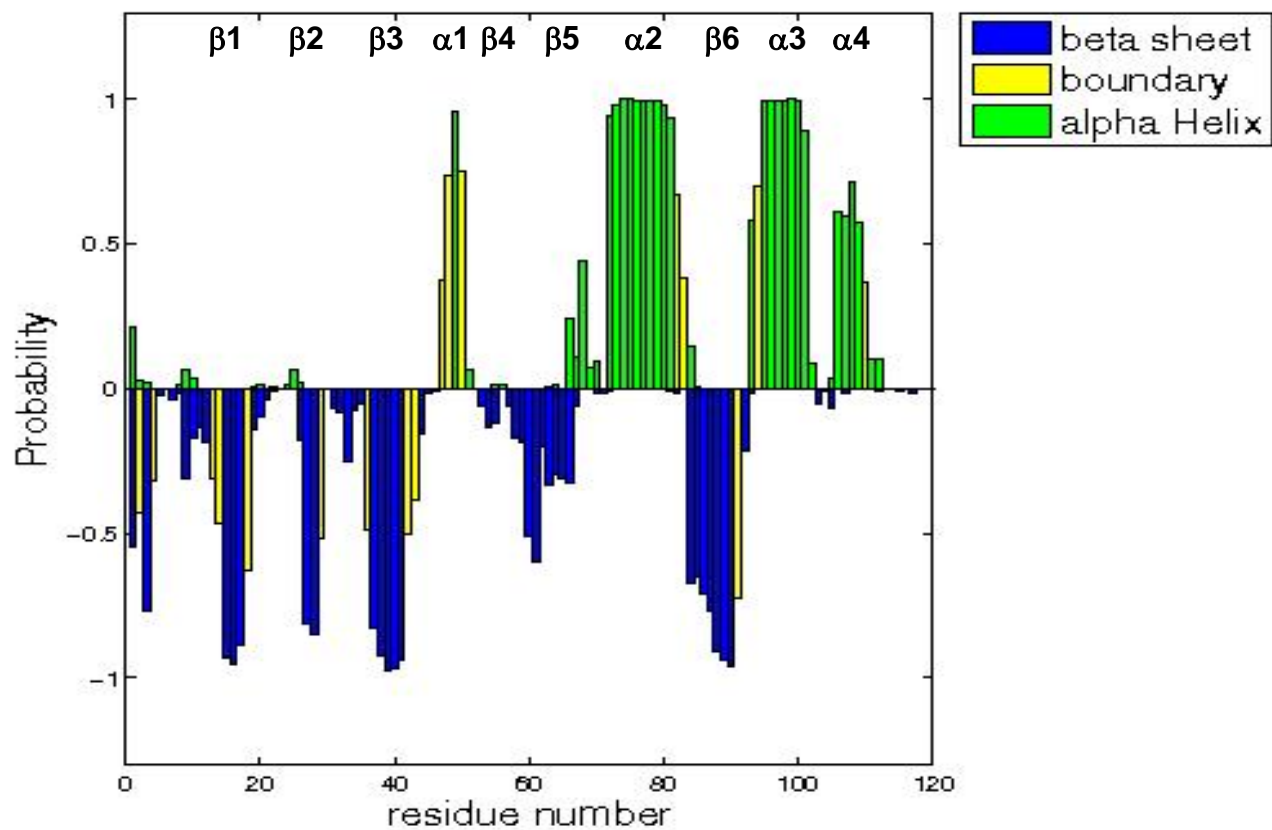

**Figure S1:** (A) Chemical Shift Index of mutant PDZ1<sup>120</sup> (Glu61->Gly61) obtained from PECAN analysis.

Figure S2

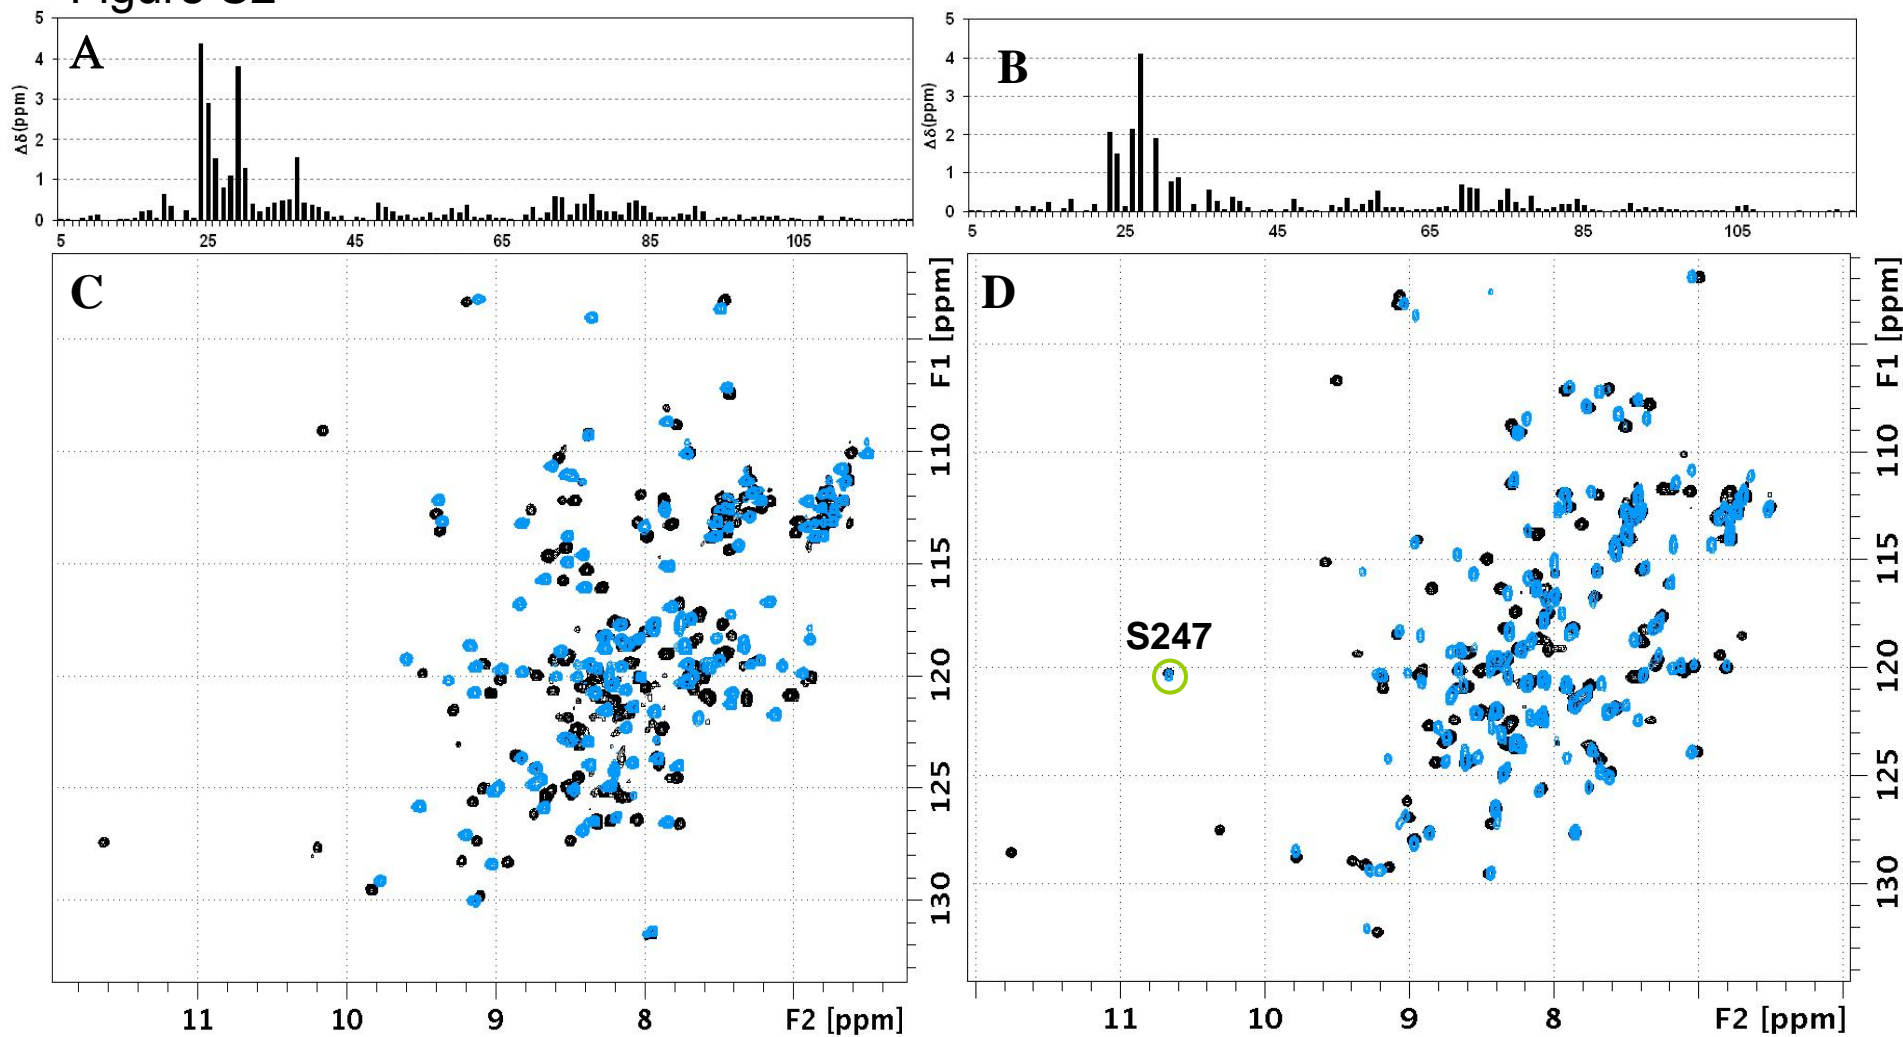

**Figure S2:** Chemical shift difference plot between the free and CFTR-C peptide bound (A) PDZ1<sup>120</sup> and (B) PDZ2<sup>270</sup> domains. The weighted difference was calculated using the relation  $\Delta = \sqrt{(\delta\text{HN})^2 + (\delta\text{N}/5)^2}$ . Corresponding overlay of  $^{15}\text{N}$ -HSQC spectra: (C) PDZ1<sup>120</sup> and (D) PDZ2<sup>270</sup> domain in the presence (black) and absence of CFTR-C peptide (blue) at 288 K. Typical protein concentrations are 400  $\mu\text{M}$  complexed with 1-2 fold excess peptides in buffer at pH 7.5.

Figure S3

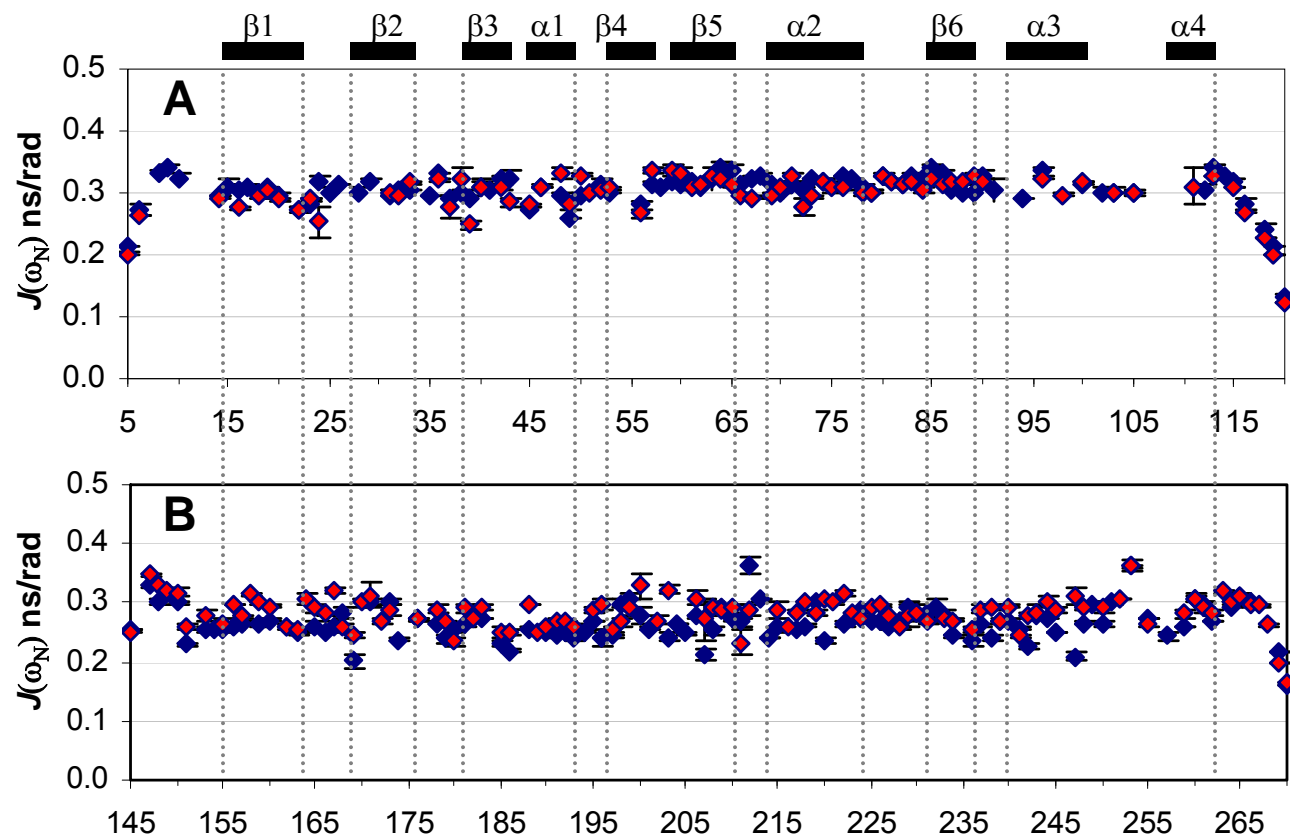

**Figure S3:** Spectral density function of apo (A) PDZ1<sup>120</sup> and (B) PDZ2<sup>270</sup> domain at nitrogen frequency,  $J(\omega_N)$ , calculated from relaxation measurements at 500 MHz in the presence (red) and absence of CFTR-C peptide (blue).

Figure S4

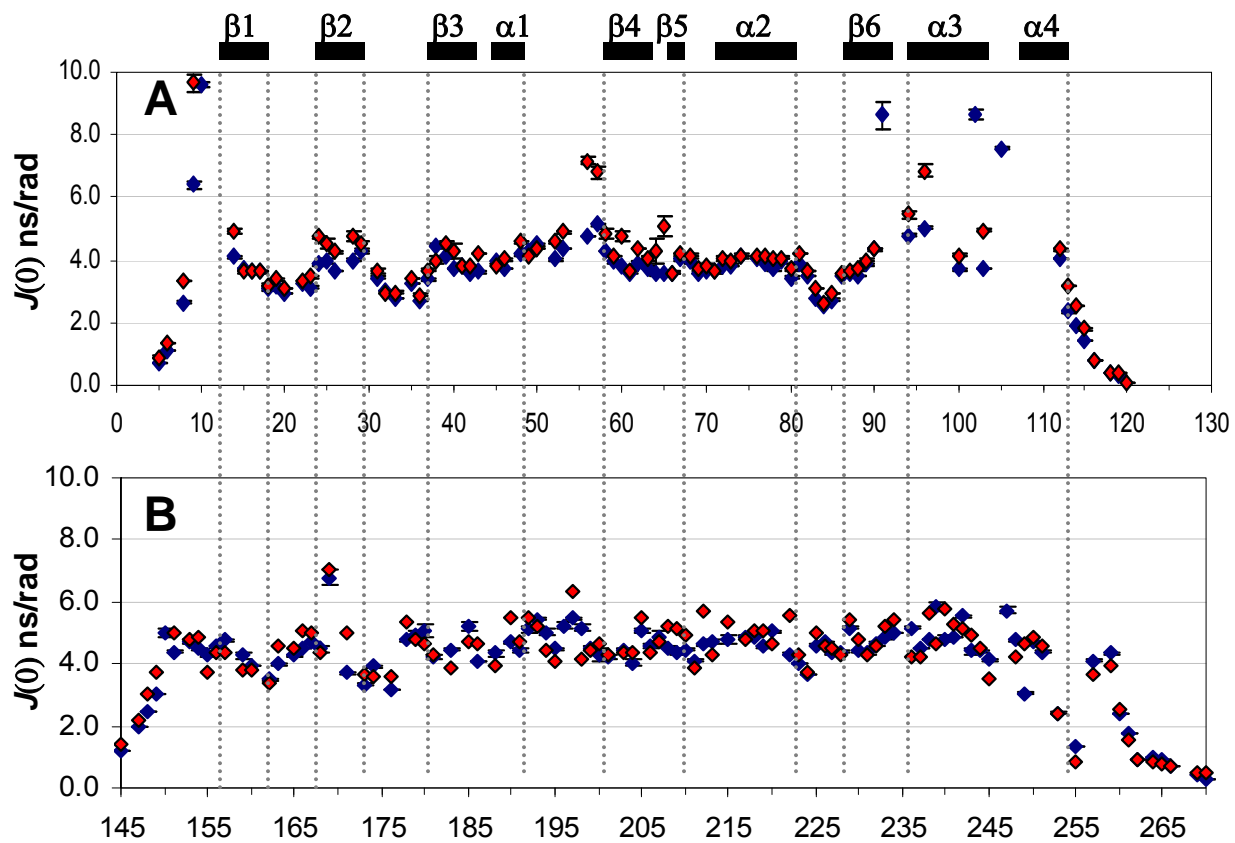

**Figure S4:** Spectral density function of apo (A) PDZ1<sup>120</sup> and (B) PDZ2<sup>270</sup> domain at zero frequency,  $J(0)$ , calculated from relaxation measurements at 500 MHz (blue) and 900 MHz (red).

- Position weight matrices calculated from protein sequence at website (<http://sbi.postech.ac.kr/pdz/>) authored by Sanguk Kim.
